# Supplementary material
Source: HighWire-hosted journal article supplement (https://bmjopen.bmj.com/content/11/12/e053377)
Supplement: inline-supplementary-material-2 [file inline-supplementary-material-2.pdf]

## Supplement Table 1: Predictor variables in the two trial registries

The tables below show the predictor variables available for the two trial registries that were used in the multiple regression models.

The “categories” column gives the categories for factors.

The “mandatory” column indicates whether the variable has to be completed on the databases.

The “log” column indicates whether the variable was log-transformed (base 2).

Study status was only used for the models of actual sample size and not the target sample size, this is because the study status was likely to change after the target sample size was set.

### clintrials.gov

| Variable                                | categories                     | mandatory | log |
|-----------------------------------------|--------------------------------|-----------|-----|
| Trend per 5 years                       |                                | Yes       | No  |
| Gender                                  | All, Male, Female              | Yes       | No  |
| Maximum age limit                       |                                | Yes       | No  |
| Minimum age limit                       |                                | Yes       | No  |
| Healthy volunteers                      | No, Yes                        | Yes+      | No  |
| Behavioral                              | Yes, No                        | Yes       | No  |
| Biological                              | Yes, No                        | Yes       | No  |
| Combination                             | Yes, No                        | Yes       | No  |
| Device                                  | Yes, No                        | Yes       | No  |
| Diagnostic                              | Yes, No                        | Yes       | No  |
| Dietary                                 | Yes, No                        | Yes       | No  |
| Drug                                    | Yes, No                        | Yes       | No  |
| Genetic                                 | Yes, No                        | Yes       | No  |
| Procedure                               | Yes, No                        | Yes       | No  |
| Radiation                               | Yes, No                        | Yes       | No  |
| Other                                   | Yes, No                        | Yes       | No  |
| Double the number of primary outcomes   |                                | Yes       | Yes |
| Double the number of secondary outcomes |                                | No        | Yes |
| Double the number of conditions         |                                | Yes       | Yes |
| Double the number of arms               |                                | Yes       | Yes |
| Lead sponsor                            | Other, NIH, Industry, U.S. Fed | Yes       | No  |
| Longitudinal                            | Yes, No                        | No        | No  |

| Variable       | categories                                                                                                                                                                                                                                              | mandatory |    |
|----------------|---------------------------------------------------------------------------------------------------------------------------------------------------------------------------------------------------------------------------------------------------------|-----------|----|
| Phase          | Phase 3, Phase 2/Phase 3, Phase 2, Phase 1, N/A, Phase 4, Phase 1/Phase 2, Early Phase 1                                                                                                                                                                | Yes       | No |
| Purpose        | Treatment, Prevention, Diagnostic, Screening, Device Feasibility, Basic Science, Other, Health Services Research, Supportive Care                                                                                                                       | Yes+      | No |
| Masking        | Triple, None, Double, Single, Quadruple, Missing                                                                                                                                                                                                        | Yes+      | No |
| Assignment     | Parallel, Factorial, Single Group, Crossover, Sequential, Missing                                                                                                                                                                                       | Yes       | No |
| Allocation     | Randomized, N/A, Non-Randomized                                                                                                                                                                                                                         | Yes+      | No |
| Adaptive_trial | Yes, No                                                                                                                                                                                                                                                 | No        | No |
| Status         | Completed, Withdrawn, Terminated, Recruiting, Active, not recruiting, Unknown status, Suspended, Enrolling by invitation, Not yet recruiting, Unknown status [Previously: Active, not recruiting], Unknown status [Previously: Enrolling by invitation] | Yes       | No |

+ = Mandatory after January 2017

## ANZCTR

| Variable                                | categories                                                                                                                                                                                                                                                                                                                                                                                                                                                                                                    | mandatory |     |
|-----------------------------------------|---------------------------------------------------------------------------------------------------------------------------------------------------------------------------------------------------------------------------------------------------------------------------------------------------------------------------------------------------------------------------------------------------------------------------------------------------------------------------------------------------------------|-----------|-----|
| Trend per 5 years                       |                                                                                                                                                                                                                                                                                                                                                                                                                                                                                                               | Yes       | No  |
| Gender                                  | All, Females, Males                                                                                                                                                                                                                                                                                                                                                                                                                                                                                           | Yes       | No  |
| Maximum age limit                       |                                                                                                                                                                                                                                                                                                                                                                                                                                                                                                               | Yes       | No  |
| Minimum age limit                       |                                                                                                                                                                                                                                                                                                                                                                                                                                                                                                               | Yes       | No  |
| Control                                 | Uncontrolled, Active, Placebo, Dose comparison, Historical                                                                                                                                                                                                                                                                                                                                                                                                                                                    | Yes       | No  |
| Double the number of primary outcomes   |                                                                                                                                                                                                                                                                                                                                                                                                                                                                                                               | Yes       | Yes |
| Double the number of secondary outcomes |                                                                                                                                                                                                                                                                                                                                                                                                                                                                                                               | Yes       | Yes |
| Area                                    | Cancer, Neurological, Cardiovascular, Stroke, Respiratory, Other, Human Genetics and Inherited Disorders, Reproductive Health and Childbirth, Blood, Infection, Inflammatory and Immune System, Skin, Musculoskeletal, Oral and Gastrointestinal, Alternative and Complementary Medicine, Public Health, Injuries and Accidents, Renal and Urogenital, Metabolic and Endocrine, Anaesthesiology, Diet and Nutrition, Mental Health, Surgery, Physical Medicine / Rehabilitation, Eye, Ear, Emergency medicine | Yes       | No  |
| Number of funders                       |                                                                                                                                                                                                                                                                                                                                                                                                                                                                                                               | Yes       | No  |
| Healthy volunteers                      | No, Yes                                                                                                                                                                                                                                                                                                                                                                                                                                                                                                       | Yes       | No  |
| Allocation                              | Non-randomised trial, Randomised controlled trial                                                                                                                                                                                                                                                                                                                                                                                                                                                             | Yes       | No  |
| Phase                                   | Phase 2, Phase 3, Phase 1 / Phase 2, Phase 3 / Phase 4, Phase 4, Phase 2 / Phase 3, Phase 1, Not Applicable, Phase 0                                                                                                                                                                                                                                                                                                                                                                                          | Yes       | No  |
| Endpoint                                | Safety/efficacy, Efficacy, Safety, Bio-equivalence, Pharmacokinetics, Pharmacodynamics, Bio-availability, Pharmacokinetics / pharmacodynamics                                                                                                                                                                                                                                                                                                                                                                 | No        | No  |
| Purpose                                 | Treatment, Prevention, Educational / counselling / training, Diagnosis                                                                                                                                                                                                                                                                                                                                                                                                                                        | Yes       | No  |
| Masking                                 | Open (masking not used), Blinded (masking used)                                                                                                                                                                                                                                                                                                                                                                                                                                                               | No        | No  |
| Assignment                              | Single group, Parallel, Factorial, Crossover, Other                                                                                                                                                                                                                                                                                                                                                                                                                                                           | No        | No  |

| <b>Variable</b> | <b>categories</b>                                                                                                                                                                                                           | <b>mandatory</b> |    |
|-----------------|-----------------------------------------------------------------------------------------------------------------------------------------------------------------------------------------------------------------------------|------------------|----|
| Intervention    | Treatment: Drugs, Rehabilitation, Prevention, None, Treatment: Other, Treatment: Surgery, Diagnosis / Prognosis, Other interventions, Treatment: Devices, Behaviour, Lifestyle, Early detection / Screening, Not applicable | Yes              | No |
| Study status    | Completed, Active, not recruiting, Recruiting, Not yet recruiting, Stopped early, Withdrawn, Suspended                                                                                                                      | Yes              | No |
