# Supplementary material
Source: HighWire-hosted journal article supplement (https://bmjopen.bmj.com/content/11/12/e053377)
Supplement: inline-supplementary-material-5 [file inline-supplementary-material-5.pdf]

Supplement Figure 2: Deviance information criterion for the fractional polynomial models used to model the Bland–Altman limits of agreement

### ANZCTR

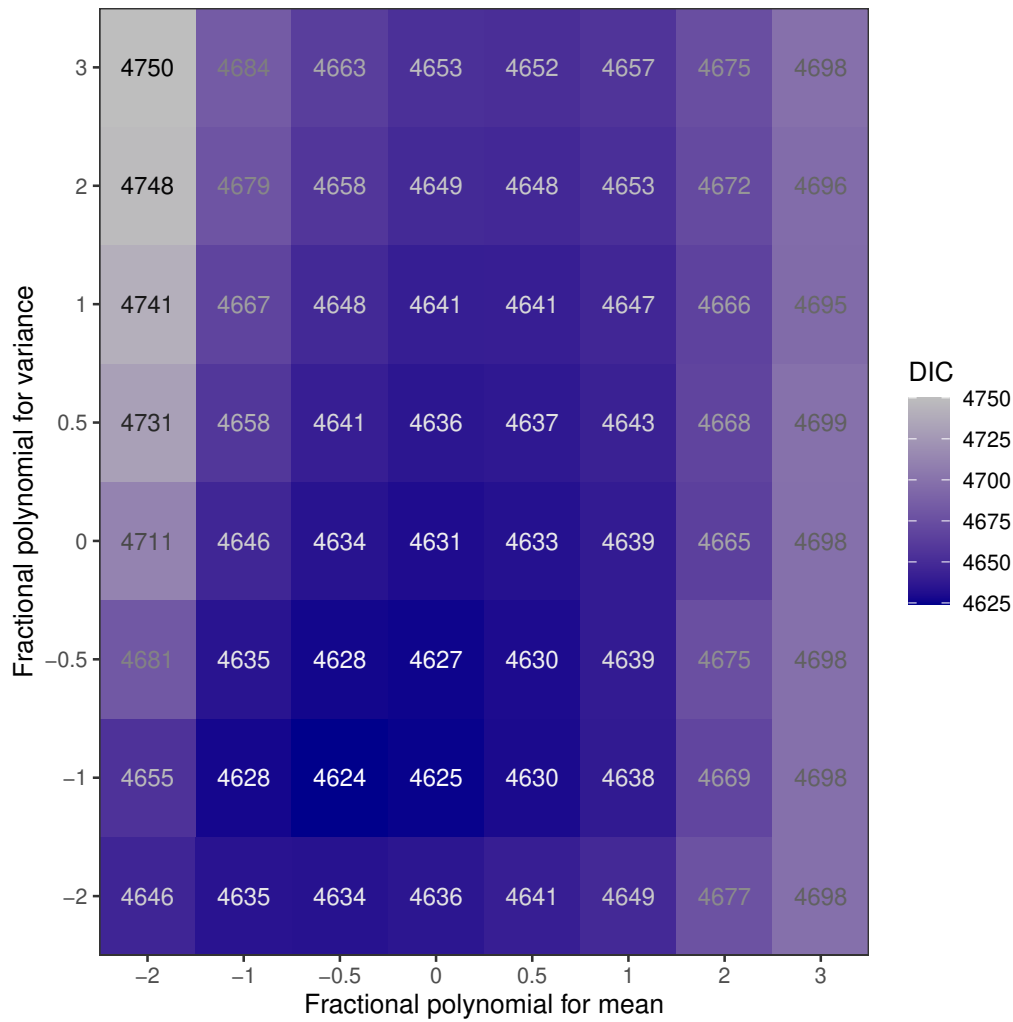

The best model is for a fractional polynomial power  $-0.5$  for the mean and  $-1$  for the variance.

## clinicaltrials.gov

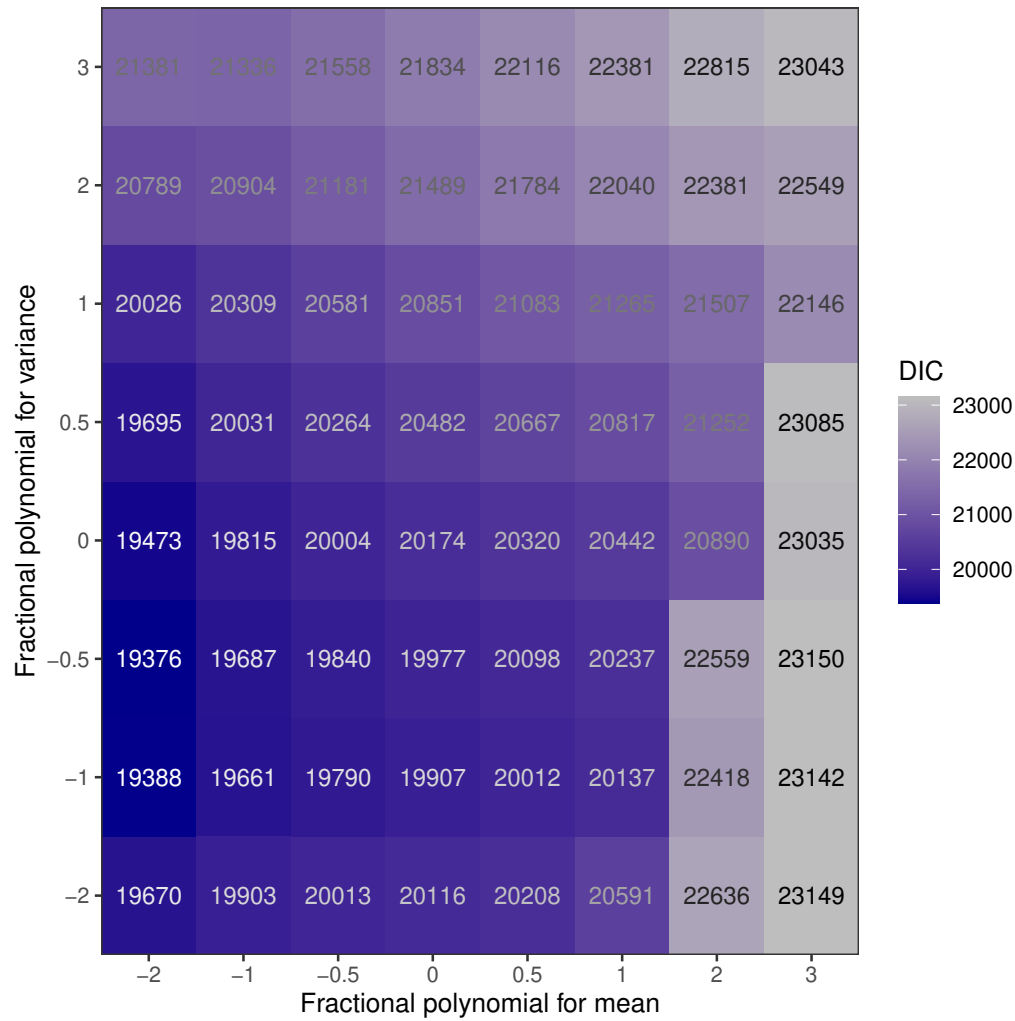

The best model is for a fractional polynomial power  $-2$  for the mean and  $-0.5$  for the variance.
