# Supplementary material
Source: HighWire-hosted journal article supplement (https://bmjopen.bmj.com/content/11/12/e053377)
Supplement: inline-supplementary-material-6 [file inline-supplementary-material-6.pdf]

Supplement Figure 3: Plots of the Markov Chain Monte Carlo estimates for the Bland-Altman limits of agreement

Plot for the two parameters used to estimate the mean

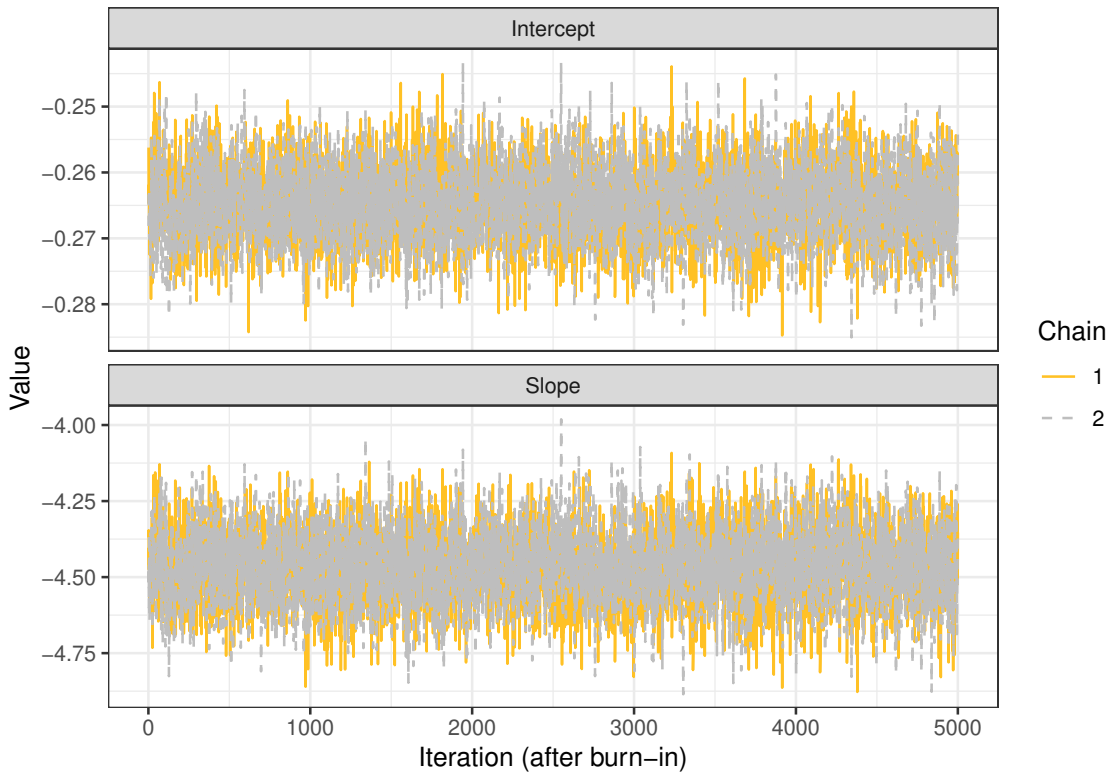

## Plot for the two parameters used to estimate the inverse-variance

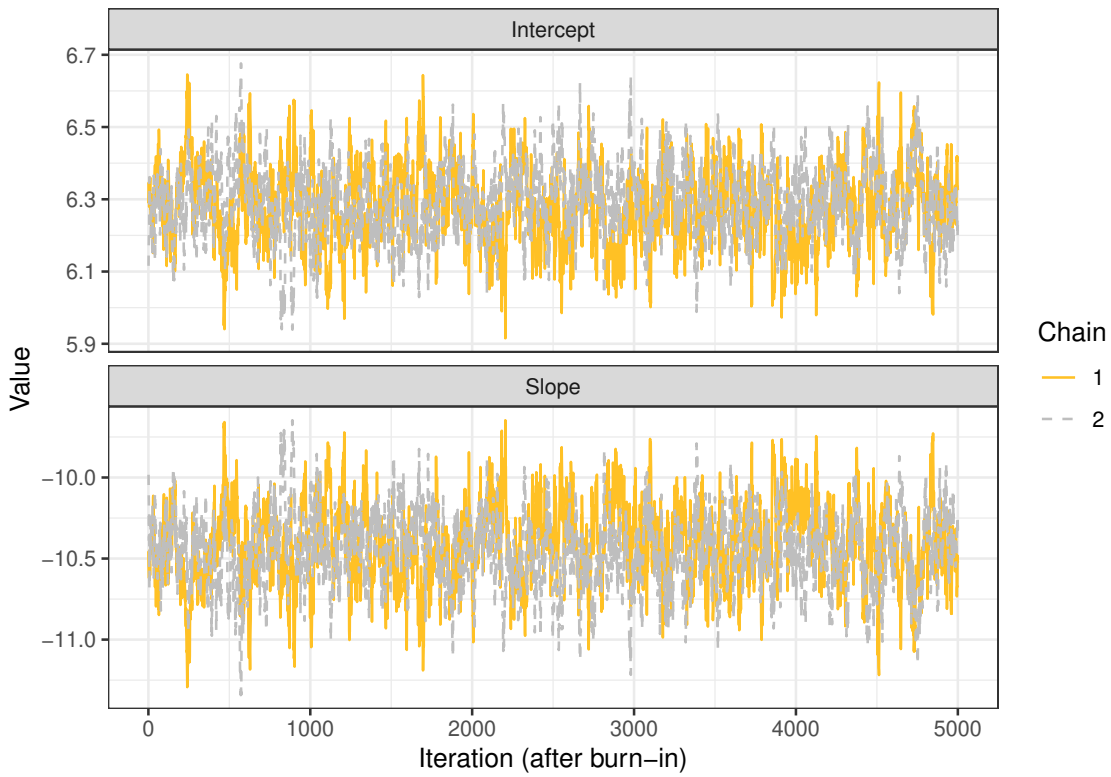

All the plots show good convergence and mixing.
