# Supplementary material
Source: HighWire-hosted journal article supplement (https://bmjopen.bmj.com/content/11/12/e053377)
Supplement: inline-supplementary-material-7 [file inline-supplementary-material-7.pdf]

Supplement table 2: Percent changes (and 95% confidence intervals) in the ratio of the target to actual sample size.

| Database           | group              | label                                   | PC             | CI             |
|--------------------|--------------------|-----------------------------------------|----------------|----------------|
| ANZCTR             | Status             | Stopped early                           | -70.2          | -71.5 to -68.8 |
|                    |                    | Withdrawn                               | -98.8          | -99.2 to -98.2 |
| clinicaltrials.gov | continuous         | Double target sample size               | -5.7           | -5.9 to -5.5   |
|                    |                    | Double the number of arms               | 8.4            | 7.3 to 9.4     |
|                    |                    | Double the number of conditions         | -1.3           | -2.1 to -0.6   |
|                    |                    | Double the number of secondary outcomes | 2.4            | 2.1 to 2.7     |
|                    |                    | Trend per 5 years                       | -4.3           | -4.8 to -3.8   |
|                    | Healthy volunteers | Yes                                     | 4.2            | 3.3 to 5.2     |
|                    | Intervention       | Radiation                               | -3.7           | -6.3 to -1.0   |
|                    | Phase              | Early Phase 1                           | -12.0          | -14.9 to -9.0  |
|                    |                    | Phase 1                                 | -11.0          | -12.1 to -9.9  |
|                    |                    | Phase 1/2                               | -8.6           | -10.3 to -6.8  |
|                    |                    | Phase 2                                 | -5.7           | -6.7 to -4.7   |
|                    | Sponsor            | Industry                                | 18.1           | 17.1 to 19.1   |
|                    |                    | NIH                                     | -7.0           | -9.8 to -4.1   |
|                    |                    | US Federal agencies                     | -10.3          | -13.3 to -7.3  |
|                    | Purpose            | Health Services Research                | 10.4           | 7.8 to 13.0    |
|                    |                    | Prevention                              | 6.4            | 5.1 to 7.7     |
|                    |                    | Screening                               | 16.3           | 11.5 to 21.4   |
|                    | Masking            | Double                                  | 3.2            | 2.0 to 4.4     |
|                    |                    | Quadruple                               | 4.2            | 2.9 to 5.5     |
|                    |                    | Single                                  | 3.3            | 2.1 to 4.5     |
|                    | Assignment         | Single group                            | -2.9           | -4.0 to -1.9   |
|                    | Allocation         | Non-Randomized                          | -2.2           | -3.4 to -1.0   |
|                    | Status             | Suspended                               | -64.5          | -68.7 to -59.7 |
| Terminated         |                    | -73.2                                   | -73.5 to -72.9 |                |
| Withdrawn          |                    | -99.9                                   | -99.9 to -99.9 |                |

PC = percent change. CI = confidence interval. Variables selected using elastic net.

Reference groups are: Healthy volunteers = No; Phase = Phase 3; Sponsor = Other; Purpose = Treatment; Masking = Blinded; Assignment = Parallel; Status = Completed. All other variables are continuous or binary meaning the reference group is 'No'.
