# Supplementary material
Source: HighWire-hosted journal article supplement (https://bmjopen.bmj.com/content/11/12/e053377)

## Supplement Figure 5: Histograms of residuals

## Models of target and actual sample size.

## ANZCTR

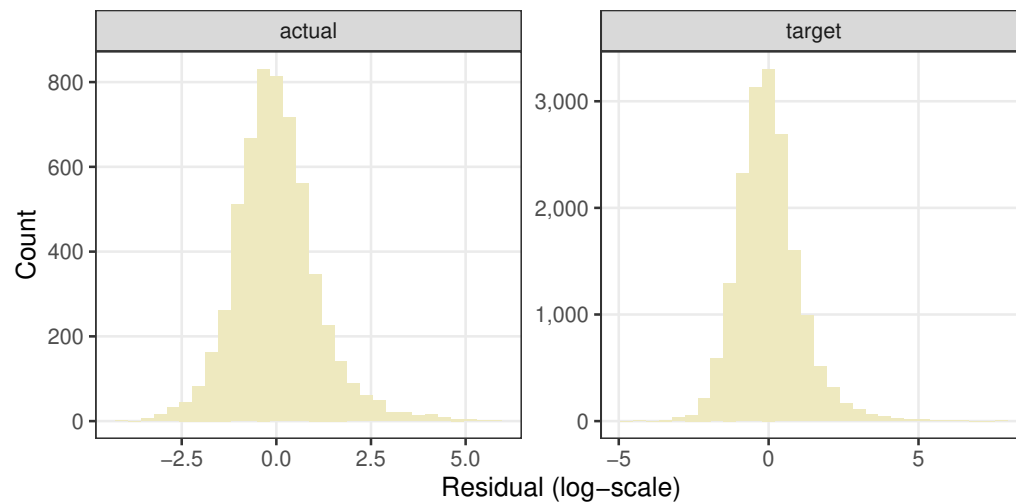

The plot shows the residuals for the actual and target sample size, and for the interventional and observational studies. The x- and y-axes vary by panel.

## clintrials.gov

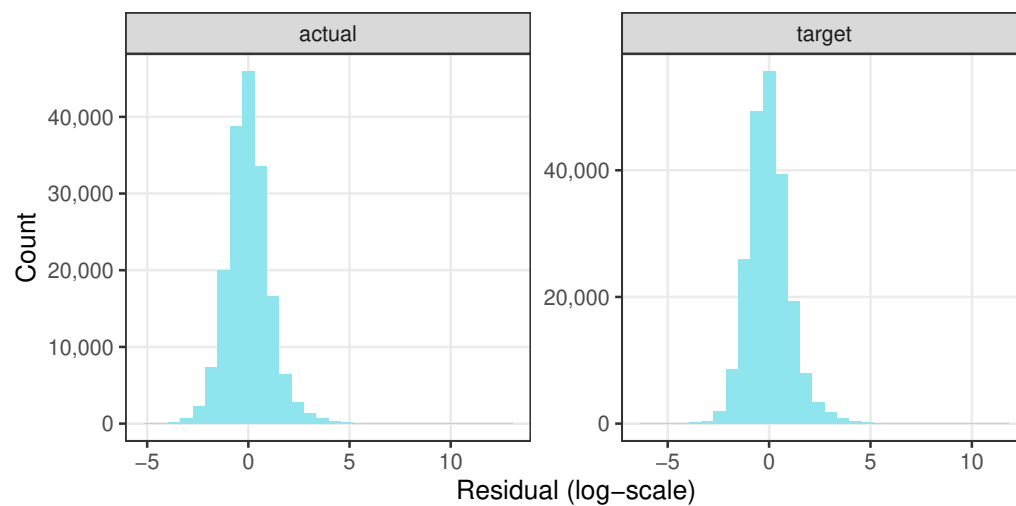

## Models of the target to actual sample size ratio

### ANZCTR

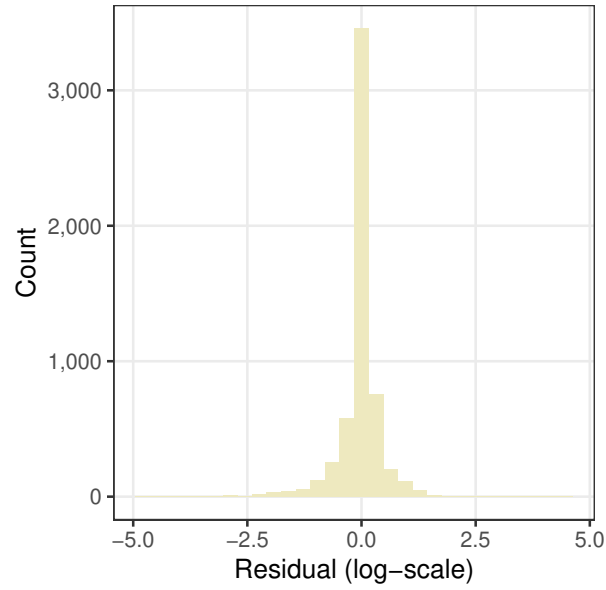

### clinicaltrials.gov

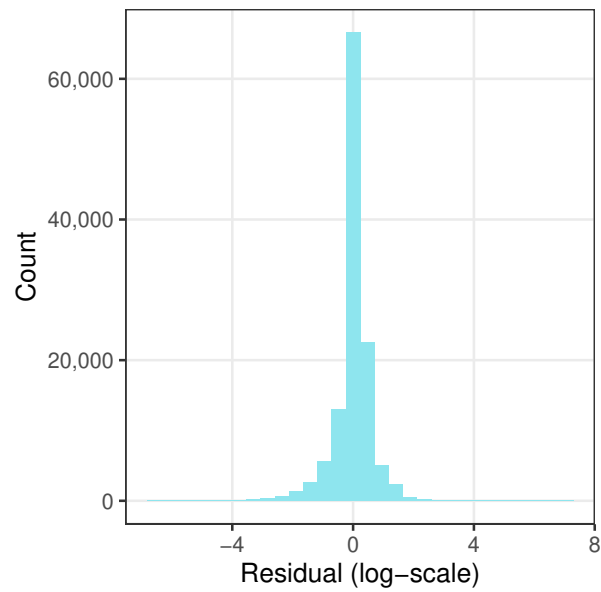

Supplement: inline-supplementary-material-9 [file inline-supplementary-material-9.pdf]
