# Supplementary material
Source: HighWire-hosted journal article supplement (https://bmjopen.bmj.com/content/11/12/e053377)
Supplement: inline-supplementary-material-10 [file inline-supplementary-material-10.pdf]

Supplement table 3: Top ten words in the brief titles of clinicaltrials.gov for studies in women only and men only

| gender | word      | Count |
|--------|-----------|-------|
| Female | cancer    | 6,081 |
|        | breast    | 4,719 |
|        | women     | 4,591 |
|        | study     | 4,292 |
|        | patients  | 3,253 |
|        | treatment | 2,420 |
|        | effect    | 1,748 |
|        | ovarian   | 1,674 |
|        | versus    | 1,626 |
|        | trial     | 1,596 |
| Male   | study     | 4,175 |
|        | prostate  | 3,022 |
|        | cancer    | 2,693 |
|        | healthy   | 2,311 |
|        | patients  | 1,920 |
|        | safety    | 1,604 |
|        | male      | 1,467 |
|        | men       | 1,192 |
|        | subjects  | 1,129 |
|        | effect    | 1,091 |

Stop words were removed and all text was converted to lower case.
